# Supplementary material for: Mycobacterial EST12 activates a RACK1–NLRP3–gasdermin D pyroptosis–IL-1β immune pathway
Source: PubMed Central journal article supplement — Sci Adv. 2020 Oct 23;6(43):eaba4733. doi: 10.1126/sciadv.aba4733 (PMC7608829; doi:10.1126/sciadv.aba4733), 2020-10-23
Supplement: aba4733_SM.pdf [file aba4733_SM.pdf]

## Supplementary Materials for

### **Mycobacterial EST12 activates a RACK1–NLRP3–gasdermin D pyroptosis–IL-1 $\beta$ immune pathway**

Zilu Qu, Jin Zhou, Yidan Zhou, Yan Xie, Yanjing Jiang, Jian Wu, Zuoqin Luo, Guanghui Liu, Lei Yin\*, Xiao-Lian Zhang\*

\*Corresponding author. Email: [zhangxiaolian@whu.edu.cn](mailto:zhangxiaolian@whu.edu.cn) (X.-L.Z.); [yinlei@whu.edu.cn](mailto:yinlei@whu.edu.cn) (L.Y.)

Published 23 October 2020, *Sci. Adv.* **6**, eaba4733 (2020)  
DOI: 10.1126/sciadv.aba4733

#### **The PDF file includes:**

Figs. S1 to S6  
Tables S1 to S4  
Legends for movies S1 and S2  
Data file S1

#### **Other Supplementary Material for this manuscript includes the following:**

(available at [advances.sciencemag.org/cgi/content/full/6/43/eaba4733/DC1](https://advances.sciencemag.org/cgi/content/full/6/43/eaba4733/DC1))

Movies S1 and S2

**Fig. S1**

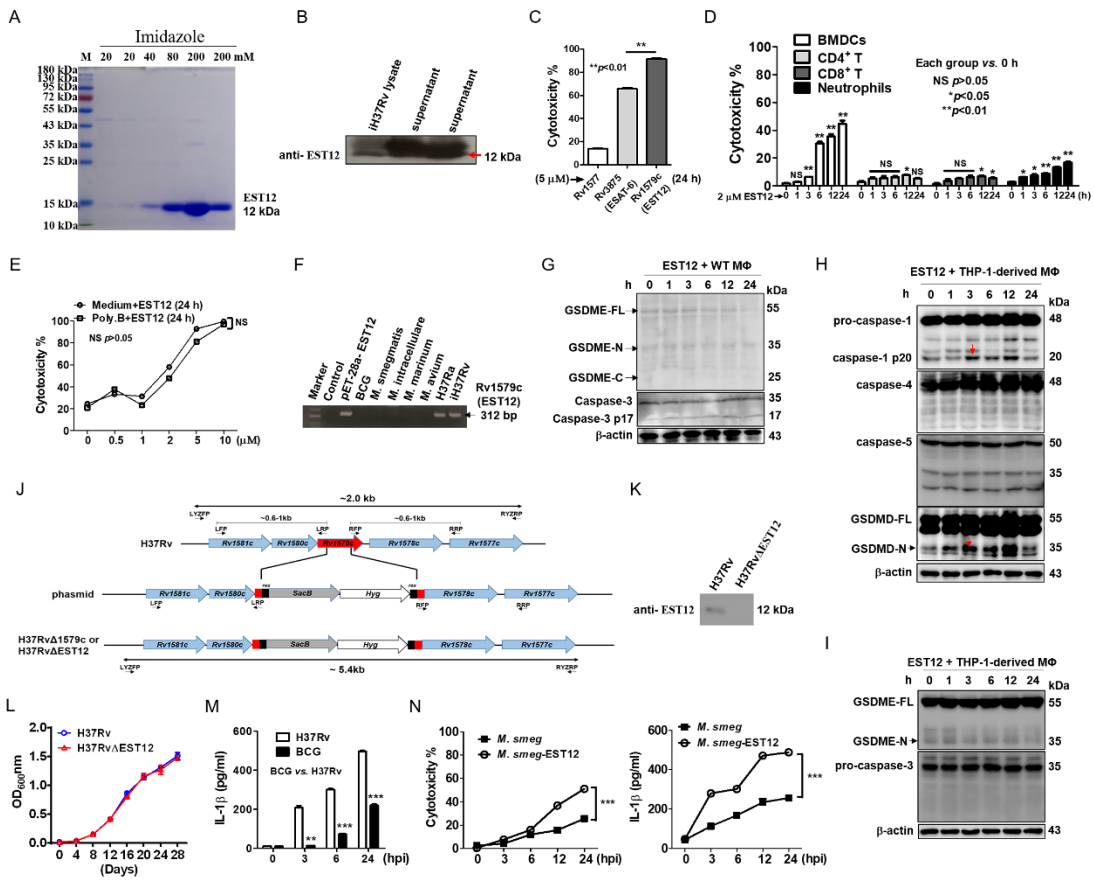

**Fig. S1. Characterization and the cytotoxicity of EST12 protein.** (A) Representative purified recombinant EST12 protein analyzed by SDS-PAGE. (B) Supernatants and whole bacterial lysates from H37Rv cultures were analyzed by WB. (C-E) Cytotoxicity assay by LDH. Peritoneal macrophages treated with Rv1577, ESAT-6 and EST12 (C). Mouse BMDCs, CD4<sup>+</sup> T, CD8<sup>+</sup> T cells and neutrophils treated with EST12. Unpaired *t*-test. (C, D). Peritoneal macrophages pretreated with Poly. B followed by EST12 treatment. Two-way ANOVA with Bonferroni's multiple comparison test (E). (F) Identification of EST12 gene in different mycobacterial strains by PCR. (G-I) Peritoneal macrophages (G) or THP-1-derived macrophages (H, I) treated with EST12 were detected for caspase-3/GSDME (G, I) and caspase-1/4/5/GSDMD (H) activation by WB. (J-L) Schematic of H37RvΔEST12 strain construction (J). The

H37Rv $\Delta$ EST12 strain examined by WB **(K)**. The growth kinetics of the strains **(L)**. **(M)** BMDMs infected with H37Rv and BCG were detected for IL-1 $\beta$  secretion by ELISA. Unpaired *t*-test. **(N)** BMDMs infected with *M. smeg* and *M. smeg*-EST12 were analyzed by LDH and ELISA. Two-way ANOVA with Bonferroni's multiple comparison test. The data are expressed as the mean  $\pm$  SEM of n =3, NS, not significant ( $p > 0.05$ ); \*  $p < 0.05$ , \*\*  $p < 0.01$ , \*\*\*  $p < 0.001$ .

Fig. S2

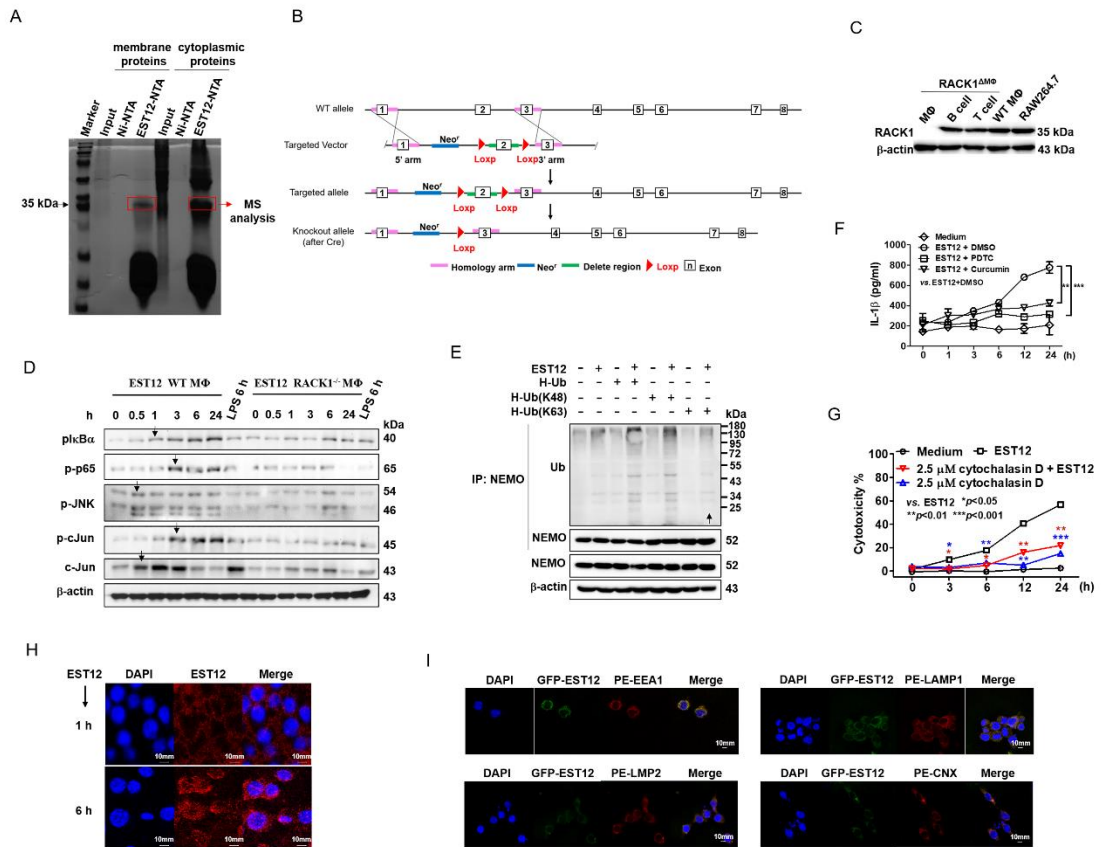

**Fig. S2. EST12 induces the activation of NF-κB/Ap-1 pathways via RACK1.** (A) An EST12-His pull-down experiment with RAW264.7 lysates analyzed by SDS-PAGE and coomassie brilliant blue staining. The specific bands were excised for MALDI-TOF/TOF MS analysis. (B) Schematic of the construction of mouse macrophage-specific deletion of RACK1. (C) WB analysis of RACK1 expression in the purified indicated cells. (D) WT and RACK1<sup>-/-</sup> peritoneal macrophages stimulated with EST12 were analyzed by WB (LPS as a control). (E) RAW264.7 cells transfected with the indicated plasmids and then stimulated with EST12 protein were subjected to IP with anti-NEMO and IB analysis. (F) Peritoneal macrophages pretreated with PDTC and curcumin, followed by EST12 stimulation, were evaluated for the secreted IL-1β by ELISA. Two-way ANOVA with Bonferroni's multiple comparison test. (G) Peritoneal

macrophages pretreated with cytochalasin D, followed by 2  $\mu$ M EST12 treatment, were analyzed by LDH assay. Unpaired *t*-test. **(H)** RAW264.7 cells stimulated with EST12 were analyzed by confocal microscopy with anti-EST12 (red) and DAPI (blue). **(I)** RAW264.7 cells transfected with pEGFP-C1-EST12 were analyzed by confocal microscopy with anti-CNX/EEA1/LAMP1/LMP2 (red) and DAPI (blue) staining. The data are expressed as the mean  $\pm$  SEM of n=3, \*  $p < 0.05$ , \*\*  $p < 0.01$ , \*\*\*  $p < 0.001$ .

Fig. S3

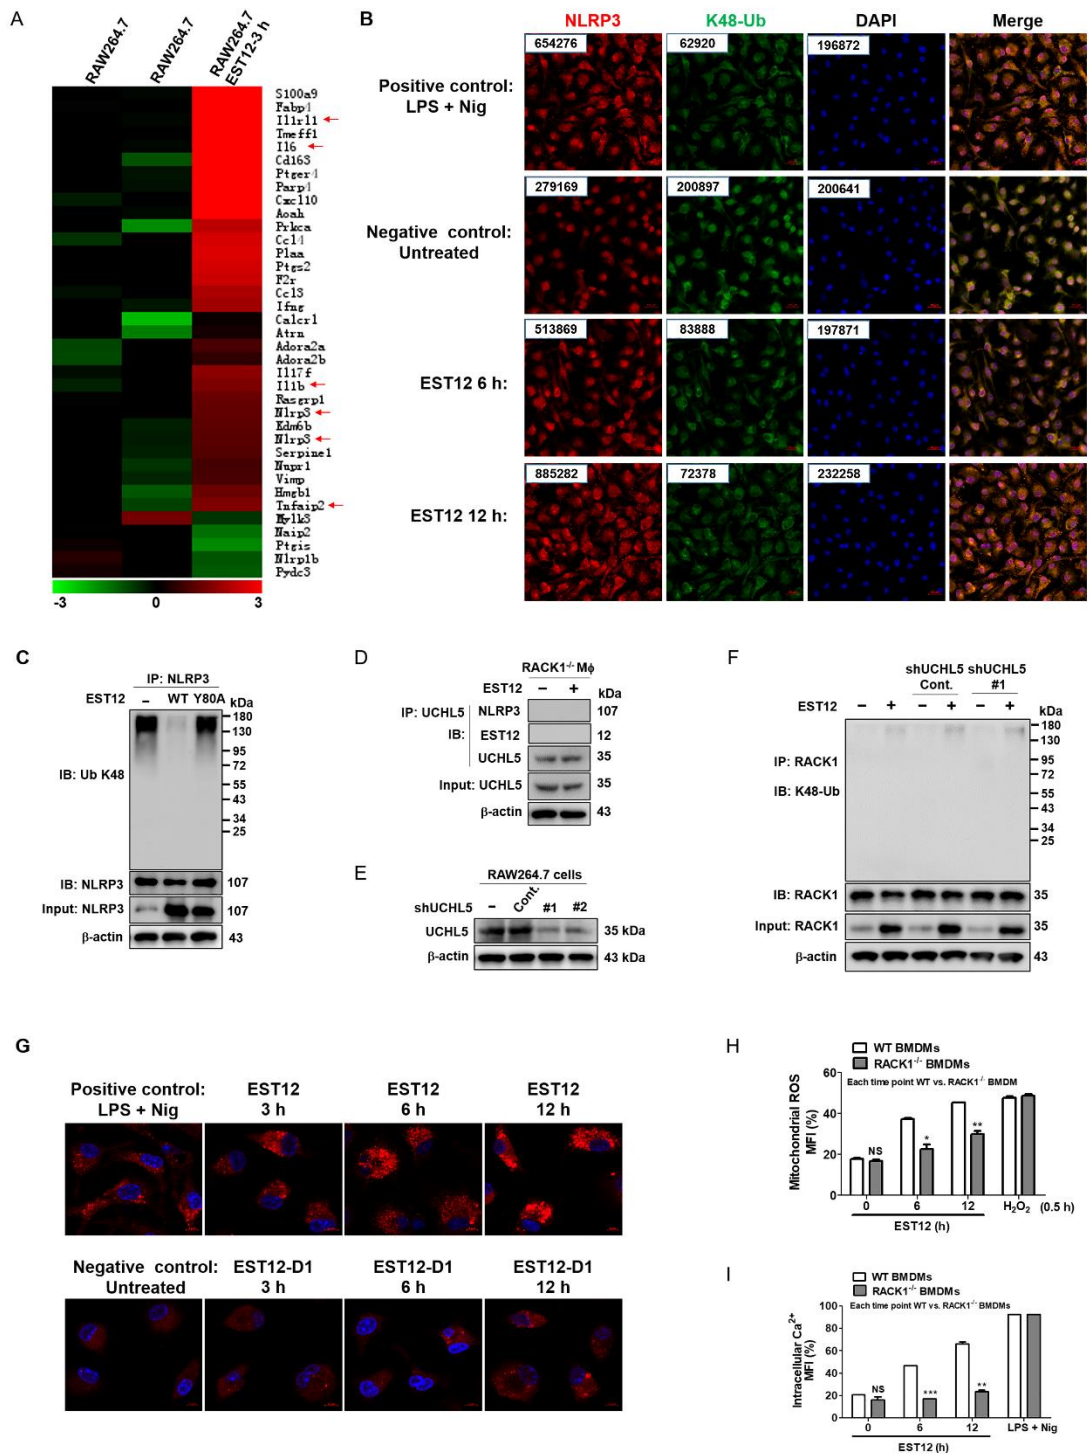

**Fig. S3. EST12 induced NLRP3 K48-deubiquitination and inflammasome activation.** (A) The microarray analysis. (B) BMDMs treated with EST12 or LPS+Nig were stained with anti-NLRP3 (green), anti-K48-Ub (red) and DAPI (blue) and analyzed by confocal microscopy. The integrated densities of NLRP3 and K48-Ub were

quantified as indicated numbers with Image J software. **(C, D, F)** BMDMs treated with EST12 or EST12-Y80A were immunoprecipitated with anti-NLRP3 **(C)**, anti-RACK1 **(D)** and anti-UCHL5 **(F)** and IB analysis. **(E)** WB analysis of UCHL5 expression in RAW264.7 cells transfected with shRNAs-UCHL5. **(G)** Peritoneal macrophages treated with EST12 or EST12-D1 were analyzed by confocal microscopy with anti-ASC (red) and DAPI (blue). LPS + Nig as a positive control. **(H, I)** Statistical analysis of the MFI percentages of the mtROS **(H)** and intracellular  $\text{Ca}^{2+}$  **(I)**. WT and RACK1<sup>-/-</sup> BMDMs treated with EST12 were analyzed by FCM. Treatments of H<sub>2</sub>O<sub>2</sub> **(H)** or LPS+Nig **(I)** as positive controls. Unpaired *t*-test. The data are expressed as the mean  $\pm$  SEM of n =3 cultures. \* *p* < 0.05, \*\* *p* < 0.01, \*\*\* *p* < 0.001, NS, not significant (*p* > 0.05).

Fig. S4

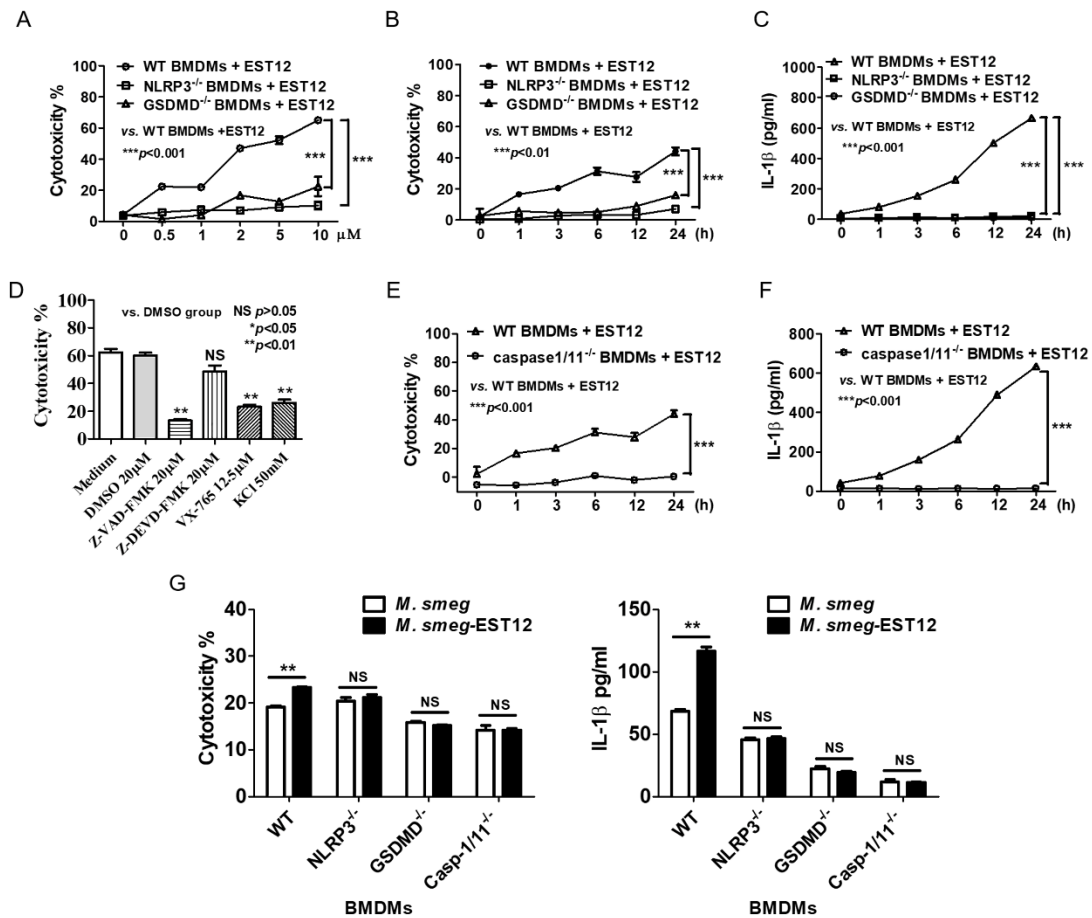

**Fig. S4. Cytotoxicity effects of EST12 on WT/NLRP3<sup>-/-</sup>/GSDMD<sup>-/-</sup>/Caspase-1/11<sup>-/-</sup> BMDMs.** (A-C) WT, NLRP3<sup>-/-</sup> and GSDMD<sup>-/-</sup> BMDMs treated with EST12 at the indicated doses (A) or for the indicated time periods (B, C) were analyzed for cytotoxicity by LDH assay (A, B) and IL-1β secretion by ELISA (C). Two-way ANOVA with Bonferroni's multiple comparison test. (D) Peritoneal macrophages pretreated with Z-VAD-FMK, Z-DEVD-FMK, VX-765, KCL and DMSO and then with EST12 stimulation for 24 h were evaluated by LDH assay. Unpaired *t*-test. (E, F) WT and caspase-1/11<sup>-/-</sup> BMDMs treated with EST12 were detected for LDH assay (E), secreted IL-1β by ELISA (F), two-way ANOVA with Bonferroni's multiple comparison test. (G) WT, NLRP3<sup>-/-</sup>, GSDMD<sup>-/-</sup> and caspase-1/11<sup>-/-</sup> BMDMs infected with *M. smeg*



and *M. smeg*-EST12 were analyzed by LDH for cytotoxicity and by ELISA for secreted IL-1 $\beta$ . Unpaired *t*-test, vs *M. smeg* was employed for analysis. The data are expressed as the mean  $\pm$  SEM of n =3. NS, not significant ( $p > 0.05$ ); \*\*  $p < 0.01$ , \*\*\*  $p < 0.001$ .

**Fig. S5**

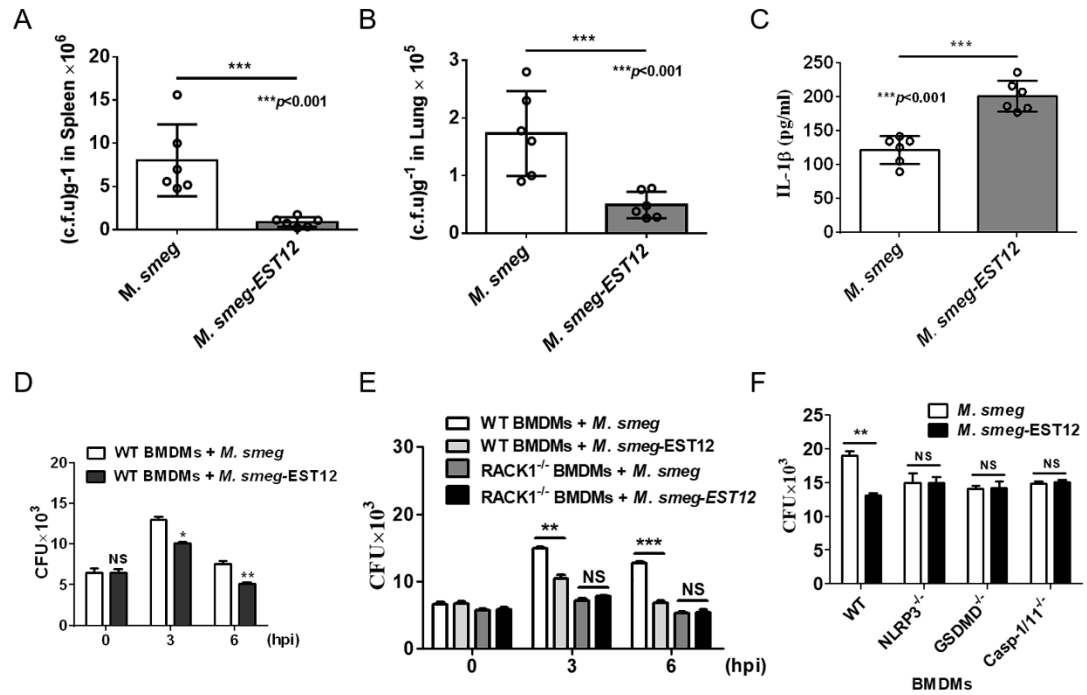

**Fig. S5. *M. smeg-EST12* increased IL-1 $\beta$  expression and bacterial clearance compared with *M. smeg*.** (A-C) On day 0, WT mice (n=6 per group) were intravenously (*i.v.*) infected with WT-*M. smeg* or *M. smeg-EST12*. On Day 3, the mice were sacrificed for CFUs assay in spleens (A) and lungs (B). The serum IL-1 $\beta$  concentrations were analyzed by ELISA (C). (D-F) WT, RACK1<sup>-/-</sup>, NLRP3<sup>-/-</sup>, GSDMD<sup>-/-</sup> and caspase-1/11<sup>-/-</sup> BMDMs were infected with *M. smeg* and *M. smeg-EST12* and CFUs were enumerated. Unpaired *t*-test. The data are expressed as the mean  $\pm$  SEM. NS, not significant ( $p > 0.05$ ); \*  $p < 0.05$ , \*\*  $p < 0.01$ .

Fig. S6

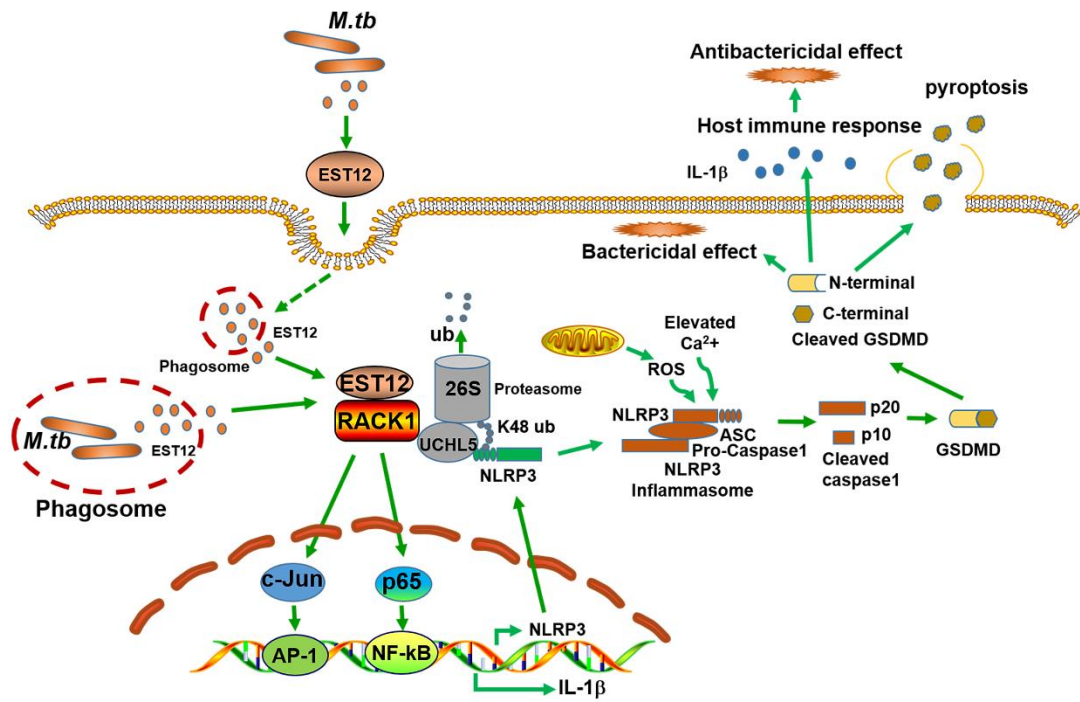

Fig. S6. A schematic mechanism model of *M.tb*-EST12-induced macrophage pyroptosis.

**Table S1. LC-MS/MS analysis.**

| No. | Protein Name | Protein ID (UniProt) | Numbers of unique peptides | Species | Protein Score <sup>#</sup> |
|-----|--------------|----------------------|----------------------------|---------|----------------------------|
| 1   | RACK1        | P68040               | 7                          | MOUSE   | 13.56                      |
| 2   | Ldha         | G5E8N5               | 6                          | MOUSE   | 12.86                      |
| 3   | Eno1         | P17182               | 6                          | MOUSE   | 10.82                      |
| 4   | Eef1a1       | P10126               | 4                          | MOUSE   | 8.9                        |
| 5   | Rps3a2       | D3Z6C3               | 3                          | MOUSE   | 6.44                       |
| 6   | TOM34        | Q9CYG7               | 3                          | MOUSE   | 6.33                       |

<sup>#</sup> A higher score indicates a more confident match.

**Table S2. Diffraction data collection and refinement statistics.**

|                                          |                                   |
|------------------------------------------|-----------------------------------|
| Space group                              | P 1 21 1                          |
| <u>Data Collection</u>                   |                                   |
| Cell dimensions                          |                                   |
| <i>a</i> , <i>b</i> , <i>c</i> (Å)       | 26.539 60.14 28.121               |
| $\alpha$ , $\beta$ , $\gamma$ (°)        | 90 107.847 90                     |
| Resolution (Å)                           | 15.7-1.9 (1.97-1.90) <sup>a</sup> |
| Rmerge (%)                               | 14.3(21.3)                        |
| I/s (I)                                  | 5.71(2.37)                        |
| Completeness (%)                         | 92(85)                            |
| Redundancy                               | 1.9(1.8)                          |
| <u>Refinement</u>                        |                                   |
| Resolution (Å)                           | 15.7-1.9(1.97-1.90) <sup>a</sup>  |
| No. reflections                          | 6582 (634)                        |
| R <sub>work</sub> /R <sub>free</sub> (%) | 20.47/24.33(28.67/31.28)          |
| No. of atoms                             |                                   |
| Protein                                  | 74                                |
| Water                                    | 37                                |
| R.m.s deviations                         |                                   |
| Bond lengths (Å)                         | 0.003                             |
| Bond angles (°)                          | 0.56                              |
| Ramachandran plot                        |                                   |
| favored region (%)                       | 100                               |
| allowed region (%)                       | 0                                 |
| outlier region (%)                       | 0                                 |

<sup>a</sup>Data for outer shell shown in parentheses

**Table S3. Reagent sources.**

| REAGENT or RESOURCE                                                                       | SOURCE                    | IDENTIFIER                             |
|-------------------------------------------------------------------------------------------|---------------------------|----------------------------------------|
| Antibodies                                                                                |                           |                                        |
| Cryopyrin (6F12) Antibody                                                                 | Santa Cruz Biotechnology  | Cat# sc-134306 Lot# RRID:AB_2152550    |
| Human/Mouse NLRP3/NALP3 Antibody                                                          | R & D systems             | Cat # MAB7578                          |
| Caspase-1 P10 (M-20) Antibody                                                             | Santa Cruz Biotechnology  | Cat# sc-514 Lot# RRID:AB_2068895       |
| Caspase-1 P20 antibody                                                                    | AdipoGen                  | Cat# AG-20B-0042-C100, RRID:AB_2755041 |
| UCHL5 antibody                                                                            | Abcam                     | Cat# ab133508, RRID:AB_2814821         |
| Anti-ubiquitin (linkage-specific K48)                                                     | Abcam                     | Cat# ab140601, RRID:AB_2783797         |
| GSDME antibody                                                                            | Abcam                     | Cat# ab215191, RRID:AB_2737000         |
| Caspase 3/P17/P19 Antibody                                                                | Proteintech               | Cat# 19677-1-AP, RRID:AB_10733244      |
| Caspase-4 antibody                                                                        | ABclonal                  | Cat# A6495, RRID:AB_2767094            |
| Caspase-5 antibody                                                                        | ABclonal                  | Cat# A16733, RRID:AB_2768720           |
| Goat anti-ASC polyclonal antibody                                                         | Santa Cruz Biotechnology  | Cat# sc-22514-R Lot# RRID:AB_2174874   |
| GAPDH (G-9) antibody                                                                      | Santa Cruz Biotechnology  | Cat# sc-365062 Lot# RRID:AB_10847862   |
| Phospho-I B (Ser32) (14D4) rabbit mAb antibody                                            | Cell Signaling Technology | Cat# 2859 Lot# RRID:AB_561111          |
| Rabbit anti-NF-KappaB P65, phospho (Ser536) mAb                                           | Cell Signaling Technology | Cat# 3033 Lot# RRID:AB_331284          |
| Phospho-JNK (Thr183/Tyr185) (G9) mouse mAb                                                | Cell Signaling Technology | Cat# 9255 Lot# RRID:AB_2307321         |
| Phospho-C-Jun (Ser73) (D47G9) XP rabbit mAb                                               | Cell Signaling Technology | Cat# 3270 Lot# RRID:AB_2129575         |
| C-Jun (60A8) rabbit mAb                                                                   | Cell Signaling Technology | Cat# 9165 Lot# RRID:AB_2130165         |
| Anti-Rabbit IgG (H+L), F(Ab') <sub>2</sub> fragment (Alexa Fluor® 594 conjugate) antibody | Cell Signaling Technology | Cat# 8889 Lot# RRID:AB_2716249         |
| Anti-mouse IgG (H+L), F(Ab') <sub>2</sub> fragment (Alexa Fluor® 488 Conjugate)           | Cell Signaling Technology | Cat# 4408, RRID:AB_10694704            |
| IKKgamma (F-10) antibody                                                                  | Santa Cruz Biotechnology  | Cat# sc-166398 Lot# RRID:AB_2011719    |

|                                                    |                   |                                                                 |
|----------------------------------------------------|-------------------|-----------------------------------------------------------------|
| Rabbit polyclonal anti-GSDMD antibody              | Ding et al., 2016 | The rabbit GSDMD polyclonal antibody was a gift from Feng Shao. |
| Ubiquitin antibody                                 | Proteintech       | Cat# 10201-2-AP<br>Lot# RRID:AB_671515                          |
| Goat Anti-Mouse IgG (H+L), HRP conjugate antibody  | Proteintech       | Cat# SA00001-1<br>Lot# RRID:AB_2722565                          |
| Goat Anti-Rabbit IgG (H+L), HRP conjugate antibody | Proteintech       | Cat# SA00001-2<br>Lot# RRID:AB_2722564                          |
| Actin antibody                                     | Proteintech       | Cat# 60008-1-Ig<br>Lot# RRID:AB_2289225                         |
| Rabbit anti-RACK1 polyclonal antibody              | Abcam             | Cat# ab62735<br>Lot# RRID:AB_956255                             |
| EST12 rabbit polyclonal antibody                   | This paper        | N/A                                                             |
| Bacterial strains                                  |                   |                                                                 |
| <i>M.tb</i> H37Rv                                  | ATCC              | ATCC 93009                                                      |
| <i>M.tb</i> H37RvΔEST12                            | This paper        | N/A                                                             |
| BCG                                                | ATCC              | ATCC 35734                                                      |
| BCG-EST12                                          | This paper        | N/A                                                             |
| <i>M. smeg</i>                                     | ATCC              | ATCC 19420                                                      |
| <i>M. smeg</i> -EST12                              | This paper        | N/A                                                             |
| <i>M. smeg</i> -EST12-D1                           | This paper        | N/A                                                             |
| <i>M. smeg</i> -EST12-D2                           | This paper        | N/A                                                             |
| <i>M. smeg</i> -EST12-E55A                         | This paper        | N/A                                                             |
| <i>M. smeg</i> -EST12-F76A                         | This paper        | N/A                                                             |
| <i>M. smeg</i> -EST12-Y80A                         | This paper        | N/A                                                             |
| <i>M. intracellulare</i>                           | ATCC              | ATCC 13950                                                      |
| <i>M. avium</i>                                    | ATCC              | ATCC 25291                                                      |
| <i>M. marinum</i>                                  | ATCC              | ATCC 927                                                        |
| <i>Escherichia coli</i> ( <i>E. coli</i> ) DH5α    | ATCC              | ATCC 25922                                                      |
| <i>E.coli</i> BL-21                                | ATCC              | ATCC BAA-1025                                                   |
| Chemicals, Peptides, and Recombinant Proteins      |                   |                                                                 |
| Middlebrook 7H9 broth                              | BD Difco™         | Cat# 271310                                                     |
| Middlebrook 7H10 agar                              | BD Difco™         | Cat# 262710                                                     |
| BD BBL™ Middlebrook OADC Enrichment                | BD Difco™         | Cat# 212351                                                     |
| Fluid Thioglycollate Medium                        | BD Difco™         | Cat# 225650                                                     |
| propidium iodide (PI)                              | Biolegend         | Cat# 421301                                                     |
| DAPI                                               | Sigma             | Cat# D9542                                                      |
| Fetal bovine serum (FBS)                           | Gibco             | Cat# 10099141                                                   |
| GM-CSF                                             | Peprtech          | Cat# 315-03-20                                                  |
| M-CSF                                              | Peprtech          | Cat# 315-02-50                                                  |

|                                                               |                          |                    |
|---------------------------------------------------------------|--------------------------|--------------------|
| IL-4                                                          | Peprotech                | Cat# 214-14-20     |
| PMA                                                           | Sigma                    | Cat# P1585         |
| Curcumin                                                      | Sigma                    | Cat# 78246         |
| PDTC                                                          | Sigma                    | Cat# P8765         |
| Z-VAD-FMK                                                     | Targetmol                | Cat# T6013         |
| Z-DEVD-FMK                                                    | Targetmol                | Cat# T6005         |
| VX-765                                                        | Targetmol                | Cat# T6090         |
| Cytochalasin D                                                | Invitrogen               | Cat# PHZ1063       |
| Ni NTA agarose                                                | Qigen                    | Cat# 30310         |
| LPS                                                           | Sigma                    | Cat# L2630         |
| Nigericin                                                     | Millipore                | Cat# 481990        |
| ploymyxin B                                                   | Sigma                    | Cat# P1004         |
| Gentamicin                                                    | Sigma                    | Cat# E003632       |
| Protein A/G magnetic beads                                    | MCE                      | Cat HY-K0202       |
| Pierce™ High Capacity<br>Endotoxin Removal Resin              | Thermo Scientific        | Fisher Cat# 88270  |
| MitoSOX Red Mitochondrial<br>Superoxide Indicator             | Thermo Scientific        | Fisher Cat# M36008 |
| Fluo 4-AM                                                     | Beyotime                 | Cat# S1060         |
| IPTG                                                          | Sigma                    | Cat# I6758         |
| NEOFECT™<br>transfection reagent                              | DNA Neofect Biotech      | Cat# TF201201      |
| jetPEI®-Macrophage                                            | Polyplus<br>Transfection | Cat# 103-05N       |
| Immobilon WesternBright ECL<br>HRP substrate                  | Advansta                 | Cat#K-12045-D10    |
| PMSF                                                          | Roche                    | Cat# 10837091001   |
| TRIzol Reagent                                                | Invitrogen               | Cat# 15596026      |
| ReverTra Ace® qPCR RT Kit                                     | Toyobo Life Science      | Cat# FSQ-101       |
| SYBR® Green Realtime PCR<br>Master Mix                        | Toyobo Life Science      | Cat# QPK-201       |
| Critical Commercial Assays                                    |                          |                    |
| EasySep™ mouse CD4 <sup>+</sup> T<br>Cell Isolation Kit       | Stemcell<br>Technologies | Cat#19852          |
| EasySep™ Mouse Naïve CD8 <sup>+</sup><br>T Cell Isolation Kit | Stemcell<br>Technologies | Cat#19858          |
| CD19 Microbeads mouse                                         | Miltenyi Biotec          | Cat#: 130-052-201  |
| CytoTox 96 Non-Radioactive<br>Cytotoxicity Assay              | Promega                  | Cat# G1780         |
| Mouse IL-1β ELISA kit                                         | Dakewe Biotech           | Cat# 1210122       |
| Experimental models:<br>Cell lines                            |                          |                    |
| RAW264.7                                                      | The China Center for     | Cat# GDC0143       |



|                                               | Type                             | Culture                    | Collection (CCTCC)                                              |
|-----------------------------------------------|----------------------------------|----------------------------|-----------------------------------------------------------------|
| THP1                                          | The China Center for             | Cat# GDC0100               |                                                                 |
|                                               | Type                             | Culture                    | Collection (CCTCC)                                              |
| Experimental models:                          |                                  |                            |                                                                 |
| Experimental organisms/strains                |                                  |                            |                                                                 |
| Mouse: C57BL/6                                | Animal Laboratory                | Center of Wuhan University | <a href="http://shydw.whu.edu.cn/">http://shydw.whu.edu.cn/</a> |
| Mouse: B6.129S6-Nlrp3 <sup>tm1Bhk/J</sup>     | The Jackson Laboratory           | Stock No: 021302           |                                                                 |
| Mouse: B6.129P2-Lyz2 <sup>tm1(cre)lfo/J</sup> | The Jackson Laboratory           | Stock No: 004781           |                                                                 |
| Mouse: Gnb211 <sup>F1/F1</sup>                | Dr. Jiyan Zhang                  | N/A                        |                                                                 |
| Mouse: GSDMD <sup>-/-</sup>                   | Dr. Feng Shao                    | N/A                        |                                                                 |
| Mouse: caspase-1/11 <sup>-/-</sup>            | Dr. Feng Shao                    | N/A                        |                                                                 |
| Oligonucleotides                              |                                  |                            |                                                                 |
| Primers for PCR, see Table S2                 | This paper                       | N/A                        |                                                                 |
| Primers for cloning, see Table S3             | This paper                       | N/A                        |                                                                 |
| Recombinant plasmids                          |                                  |                            |                                                                 |
| pET-28a-Rv1579c                               | This paper                       | N/A                        |                                                                 |
| pET-22b-Rv1579c                               | This paper                       | N/A                        |                                                                 |
| pMV261-Rv1579c                                | This paper                       | N/A                        |                                                                 |
| pMV261-Rv1579c-D1                             | This paper                       | N/A                        |                                                                 |
| pMV261-Rv1579c-D2                             | This paper                       | N/A                        |                                                                 |
| pMV261-Rv1579c-E55A                           | This paper                       | N/A                        |                                                                 |
| pMV261-Rv1579c-F76A                           | This paper                       | N/A                        |                                                                 |
| pMV261-Rv1579c-Y80A                           | This paper                       | N/A                        |                                                                 |
| pEGFP-C1-Rv1579c                              | This paper                       | N/A                        |                                                                 |
| pAsRED2-C1-RACK1                              | This paper                       | N/A                        |                                                                 |
| pSilencer 1.0-U6-sh-UCHL5                     | This paper                       | N/A                        |                                                                 |
| pET-28a- Rv1579c -D1                          | This paper                       | N/A                        |                                                                 |
| pET-28a- Rv1579c -D2                          | This paper                       | N/A                        |                                                                 |
| pET-28a- Rv1579c -Y80A                        | This paper                       | N/A                        |                                                                 |
| pET-28a- Rv1579c -F76A                        | This paper                       | N/A                        |                                                                 |
| pET-28a- Rv1579c -E55A                        | This paper                       | N/A                        |                                                                 |
| wild-type ubiquitin (H-Ub)                    | Drs. Hongbing Shu and Yanyi Wang | N/A                        |                                                                 |
| ubiquitin mutant H-Ub (K48)                   | Drs. Hongbing Shu and Yanyi Wang | N/A                        |                                                                 |
| ubiquitin mutant H-Ub (K63)                   | Drs. Hongbing Shu                | N/A                        |                                                                 |

---

and Yanyi Wang

---

Software and Algorithms

---

GraphPad Prism

GraphPad Software

<https://www.graphpad.com>.

RRID:

SCR\_002798

---

**Table S4. Primer sequences for molecular cloning.**

| <b>Primer names</b>          | <b>Primer sequences</b>                                                                                                                                              | <b>Restriction Endonuclease</b>  |
|------------------------------|----------------------------------------------------------------------------------------------------------------------------------------------------------------------|----------------------------------|
| pET-28a-Rv1579c              | Forward: TAGGATCCATGACCCCGATCAACC<br>Reverse: TTAAGCTTCGATGGCGACCCCG                                                                                                 | <i>Bam</i> HI<br><i>Hind</i> III |
| pET-22b-Rv1579c              | Forward: TAGGATCCATGACCCCGATCAACC<br>Reverse: TTAAGCTTCGATGGCGACCCCG                                                                                                 | <i>Bam</i> HI<br><i>Hind</i> III |
| pMV261-Rv1579c               | Forward: TAGGATCCATGACCCCGATCAACC<br>Reverse: TTAAGCTTCGATGGCGACCCCG                                                                                                 | <i>Bam</i> HI<br><i>Hind</i> III |
| pEGFP-C1-Rv1579c             | Forward: ATCTCGAGAATGACCCCGATCAACCGG<br>Reverse: ATGAATTCATCGATGGCGACCCCGCCC                                                                                         | <i>Xho</i> I<br><i>Eco</i> RI    |
| pAsRED2-C1-RACK1             | Forward: GCAAGCTTCTATGACCGAGCAGATGAC<br>Reverse: AGCTGCAGAGCGGGTACCAATAGTTA                                                                                          | <i>Hind</i> III<br><i>Pst</i> I  |
| pSilencer 1.0-U6-sh-UCHL5 1# | Oligo1: GGAGTGGTGTCTCATGGAAAGTTCA<br>Oligo2: AGCTTGAACCTTCCATGAGACACCACTCCGGCC<br>Oligo3: AGCTTCTTTCCATGAGACACCACTCCTTTTT<br>Oligo4: AATTAAAAAGGAGTGGTGTCTCATGGAAAGA | Oligo1+Oligo 2<br>Oligo3+Oligo 4 |
| pSilencer 1.0-U6-sh-UCHL5 2# | Oligo1: GGGTCTTCACCGAGCTCATTATTCA<br>Oligo2: AGCTTGAATAATGAGCTCGGTGAAGACCCGGCC<br>Oligo3: AGCTTTAATGAGCTCGGTGAAGACCCTTTTT<br>Oligo4: AATTAAAAAGGGTCTTCACCGAGCTCATTAA | Oligo1+Oligo 2<br>Oligo3+Oligo 4 |
| pET-28a-EST12-D1             | Forward: TTGGATCCGTGACCCCGATCAA<br>Reverse: TTAAGCTTGCAAGCCAGTCAC                                                                                                    | <i>Bam</i> HI<br><i>Hind</i> III |
| pET-28a-EST12-D2             | Forward: TTGGATCCATGTGCTCACCCGA<br>Reverse: TTAAGCTTCGATGGCGACCCCG                                                                                                   | <i>Bam</i> HI<br><i>Hind</i> III |
| pET-28a-EST12-Y80A           | Forward: CTTGCCTTCCACGCGTCGGCTCCCGGCAACGACCCGC<br>TGC                                                                                                                |                                  |

**Movie S1. Pyroptosis effect of EST12 protein on murine peritoneal macrophage.**

Representative video of PI uptake by WT mouse peritoneal macrophages after treatment with EST12. WT mouse peritoneal macrophages were treated with 2  $\mu$ M EST12 for 4 h, and then stained with 5 ng/ml PI to monitor cell membrane integrity. Imaging was carried out using Zeiss LSM 880 with a 63 $\times$ /1.49 NA oil objective. The total time was 100 min, and images were acquired every 2.5 min.

**Movie S2. Effect of EST12 protein on the RACK1<sup>-/-</sup> peritoneal macrophage.**

Representative video of PI uptake by RACK1<sup>-/-</sup> mouse peritoneal macrophages after treatment with EST12. RACK1<sup>-/-</sup> mouse peritoneal macrophages were treated with 2  $\mu$ M EST12 for 4 h, and then stained with 5 ng/ml PI to monitor cell membrane integrity. Imaging was carried out using Zeiss LSM 880 with a 63 $\times$ /1.49 NA oil objective. The total time was 100 min, and images were acquired every 2.5 min.

Data file S1. Full wwPDB X-ray structure validation report.

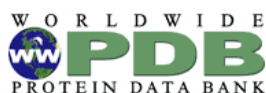

## Preliminary Full wwPDB X-ray Structure Validation Report ⓘ

Nov 12, 2019 04:05 AM EST

This is a Preliminary Full wwPDB X-ray Structure Validation Report.

This report is produced by the standalone wwPDB validation server.  
**The structure in question has not been deposited to the wwPDB.**  
**This report should not be submitted to journals.**

We welcome your comments at [validation@mail.wwpdb.org](mailto:validation@mail.wwpdb.org)

A user guide is available at

<https://www.wwpdb.org/validation/2017/XrayValidationReportHelp>

with specific help available everywhere you see the ⓘ symbol.

---

The following versions of software and data (see [references ⓘ](#)) were used in the production of this report:

|                                |   |                                                                    |
|--------------------------------|---|--------------------------------------------------------------------|
| MolProbity                     | : | 4.02b-467                                                          |
| Xtrriage (Phenix)              | : | 1.13                                                               |
| EDS                            | : | 2.6.1                                                              |
| Percentile statistics          | : | 20171227.v01 (using entries in the PDB archive December 27th 2017) |
| Refmac                         | : | 5.8.0158                                                           |
| CCP4                           | : | 7.0.044 (Gargrove)                                                 |
| Ideal geometry (proteins)      | : | Engh & Huber (2001)                                                |
| Ideal geometry (DNA, RNA)      | : | Parkinson et al. (1996)                                            |
| Validation Pipeline (wwPDB-VP) | : | 2.6.1                                                              |

## 1 Overall quality at a glance i

The following experimental techniques were used to determine the structure:

*X-RAY DIFFRACTION*

The reported resolution of this entry is 1.90 Å.

Percentile scores (ranging between 0-100) for global validation metrics of the entry are shown in the following graphic. The table shows the number of entries on which the scores are based.

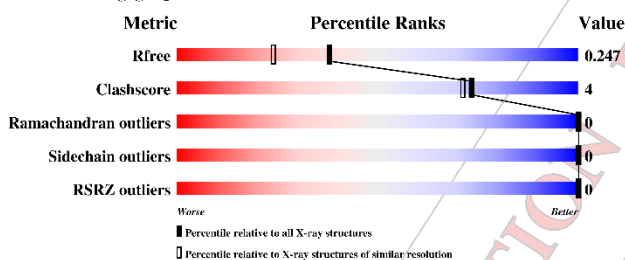

| Metric                | Whole archive<br>(#Entries) | Similar resolution<br>(#Entries, resolution range(Å)) |
|-----------------------|-----------------------------|-------------------------------------------------------|
| $R_{free}$            | 111664                      | 5502 (1.90-1.90)                                      |
| Clashscore            | 122126                      | 6115 (1.90-1.90)                                      |
| Ramachandran outliers | 120053                      | 6048 (1.90-1.90)                                      |
| Sidechain outliers    | 120020                      | 6048 (1.90-1.90)                                      |
| RSRZ outliers         | 108989                      | 5379 (1.90-1.90)                                      |

The table below summarises the geometric issues observed across the polymeric chains and their fit to the electron density. The red, orange, yellow and green segments on the lower bar indicate the fraction of residues that contain outliers for  $\geq 3$ , 2, 1 and 0 types of geometric quality criteria respectively. A grey segment represents the fraction of residues that are not modelled. The numeric value for each fraction is indicated below the corresponding segment, with a dot representing fractions  $\leq 5\%$ . The upper red bar (where present) indicates the fraction of residues that have poor fit to the electron density. The numeric value is given above the bar.

| Mol | Chain | Length | Quality of chain |
|-----|-------|--------|------------------|
| 1   | A     | 74     |                  |

## 2 Entry composition [i](#)

There are 2 unique types of molecules in this entry. The entry contains 608 atoms, of which 0 are hydrogens and 0 are deuteriums.

In the tables below, the ZeroOcc column contains the number of atoms modelled with zero occupancy, the AltConf column contains the number of residues with at least one atom in alternate conformation and the Trace column contains the number of residues modelled with at most 2 atoms.

- Molecule 1 is a protein.

| Mol | Chain | Residues | Atoms |     |     |     |   | ZeroOcc | AltConf | Trace |
|-----|-------|----------|-------|-----|-----|-----|---|---------|---------|-------|
|     |       |          | Total | C   | N   | O   | S |         |         |       |
| 1   | A     | 74       | 571   | 354 | 100 | 114 | 3 | 0       | 1       | 0     |

- Molecule 2 is water.

| Mol | Chain | Residues | Atoms |    | ZeroOcc | AltConf |
|-----|-------|----------|-------|----|---------|---------|
|     |       |          | Total | O  |         |         |
| 2   | S     | 37       | 37    | 37 | 0       | 0       |

### 3 Residue-property plots [i](#)

These plots are drawn for all protein, RNA and DNA chains in the entry. The first graphic for a chain summarises the proportions of the various outlier classes displayed in the second graphic. The second graphic shows the sequence view annotated by issues in geometry and electron density. Residues are color-coded according to the number of geometric quality criteria for which they contain at least one outlier: green = 0, yellow = 1, orange = 2 and red = 3 or more. A red dot above a residue indicates a poor fit to the electron density ( $RSRZ > 2$ ). Stretches of 2 or more consecutive residues without any outlier are shown as a green connector. Residues present in the sample, but not in the model, are shown in grey.

- Molecule 1:

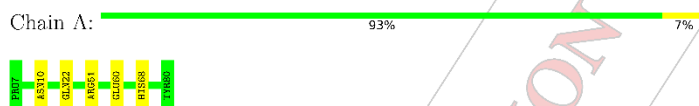



4 Data and refinement statistics i

| Property                                                                | Value                                                       | Source           |
|-------------------------------------------------------------------------|-------------------------------------------------------------|------------------|
| Space group                                                             | P 1 21 1                                                    | Depositor        |
| Cell constants<br>a, b, c, $\alpha$ , $\beta$ , $\gamma$                | 26.54Å 60.14Å 28.12Å<br>90.00° 107.85° 90.00°               | Depositor        |
| Resolution (Å)                                                          | 19.34 – 1.90<br>30.07 – 1.90                                | Depositor<br>EDS |
| % Data completeness<br>(in resolution range)                            | 92.3 (19.34-1.90)<br>93.5 (30.07-1.90)                      | Depositor<br>EDS |
| $R_{merge}$                                                             | (Not available)                                             | Depositor        |
| $R_{sym}$                                                               | (Not available)                                             | Depositor        |
| $\langle I/\sigma(I) \rangle$ <sup>1</sup>                              | 1.35 (at 1.91Å)                                             | Xtrriage         |
| Refinement program                                                      | phenix.refine 1.10.1_2155, PHENIX 1.10.1_2155               | Depositor        |
| R, $R_{free}$                                                           | 0.205, 0.244<br>0.206, 0.247                                | Depositor<br>DCC |
| $R_{free}$ test set                                                     | 657 reflections (10.05%)                                    | wwPDB-VP         |
| Wilson B-factor (Å <sup>2</sup> )                                       | 31.7                                                        | Xtrriage         |
| Anisotropy                                                              | 0.518                                                       | Xtrriage         |
| Bulk solvent $k_{sol}$ (e/Å <sup>3</sup> ), $B_{sol}$ (Å <sup>2</sup> ) | 0.37, 51.4                                                  | EDS              |
| L-test for twinning <sup>2</sup>                                        | $\langle  L  \rangle = 0.50$ , $\langle L^2 \rangle = 0.33$ | Xtrriage         |
| Estimated twinning fraction                                             | No twinning to report.                                      | Xtrriage         |
| $F_o, F_c$ correlation                                                  | 0.94                                                        | EDS              |
| Total number of atoms                                                   | 608                                                         | wwPDB-VP         |
| Average B, all atoms (Å <sup>2</sup> )                                  | 39.0                                                        | wwPDB-VP         |

Xtrriage's analysis on translational NCS is as follows: *The largest off-origin peak in the Patterson function is 9.92% of the height of the origin peak. No significant pseudotranslation is detected.*

<sup>1</sup> Intensities estimated from amplitudes.

<sup>2</sup> Theoretical values of  $\langle |L| \rangle$ ,  $\langle L^2 \rangle$  for acentric reflections are 0.5, 0.333 respectively for untwinned datasets, and 0.375, 0.2 for perfectly twinned datasets.

## 5 Model quality [i](#)

### 5.1 Standard geometry [i](#)

The Z score for a bond length (or angle) is the number of standard deviations the observed value is removed from the expected value. A bond length (or angle) with  $|Z| > 5$  is considered an outlier worth inspection. RMSZ is the root-mean-square of all Z scores of the bond lengths (or angles).

| Mol | Chain | Bond lengths |         | Bond angles |         |
|-----|-------|--------------|---------|-------------|---------|
|     |       | RMSZ         | # Z  >5 | RMSZ        | # Z  >5 |
| 1   | A     | 0.32         | 0/584   | 0.52        | 0/793   |

There are no bond length outliers.

There are no bond angle outliers.

There are no chirality outliers.

There are no planarity outliers.

### 5.2 Too-close contacts [i](#)

In the following table, the Non-H and H(model) columns list the number of non-hydrogen atoms and hydrogen atoms in the chain respectively. The H(added) column lists the number of hydrogen atoms added and optimized by MolProbity. The Clashes column lists the number of clashes within the asymmetric unit, whereas Symm-Clashes lists symmetry related clashes.

| Mol | Chain | Non-H | H(model) | H(added) | Clashes | Symm-Clashes |
|-----|-------|-------|----------|----------|---------|--------------|
| 1   | A     | 571   | 0        | 544      | 4       | 0            |
| 2   | S     | 37    | 0        | 0        | 3       | 0            |
| All | All   | 608   | 0        | 544      | 4       | 0            |

The all-atom clashscore is defined as the number of clashes found per 1000 atoms (including hydrogen atoms). The all-atom clashscore for this structure is 4.

All (4) close contacts within the same asymmetric unit are listed below, sorted by their clash magnitude.

| Atom-1            | Atom-2         | Interatomic distance (Å) | Clash overlap (Å) |
|-------------------|----------------|--------------------------|-------------------|
| 1:A:22:GLN:NE2    | 2:S:28:HOH:O   | 2.31                     | 0.63              |
| 1:A:10:ASN:ND2    | 2:S:33:HOH:O   | 2.28                     | 0.60              |
| 1:A:68:HIS:ND1    | 2:S:29:HOH:O   | 2.32                     | 0.59              |
| 1:A:51[B]:ARG:NH1 | 1:A:60:GLU:HG3 | 2.37                     | 0.40              |

There are no symmetry-related clashes.

### 5.3 Torsion angles [i](#)

#### 5.3.1 Protein backbone [i](#)

In the following table, the Percentiles column shows the percent Ramachandran outliers of the chain as a percentile score with respect to all X-ray entries followed by that with respect to entries of similar resolution.

The Analysed column shows the number of residues for which the backbone conformation was analysed, and the total number of residues.

| Mol | Chain | Analysed    | Favoured  | Allowed | Outliers | Percentiles |
|-----|-------|-------------|-----------|---------|----------|-------------|
| 1   | A     | 73/74 (99%) | 73 (100%) | 0       | 0        | 100 100     |

There are no Ramachandran outliers to report.

#### 5.3.2 Protein sidechains [i](#)

In the following table, the Percentiles column shows the percent sidechain outliers of the chain as a percentile score with respect to all X-ray entries followed by that with respect to entries of similar resolution.

The Analysed column shows the number of residues for which the sidechain conformation was analysed, and the total number of residues.

| Mol | Chain | Analysed     | Rotameric | Outliers | Percentiles |
|-----|-------|--------------|-----------|----------|-------------|
| 1   | A     | 60/59 (102%) | 60 (100%) | 0        | 100 100     |

There are no protein residues with a non-rotameric sidechain to report.

Some sidechains can be flipped to improve hydrogen bonding and reduce clashes. There are no such sidechains identified.

#### 5.3.3 RNA [i](#)

There are no RNA molecules in this entry.

### 5.4 Non-standard residues in protein, DNA, RNA chains [i](#)

There are no non-standard protein/DNA/RNA residues in this entry.

### 5.5 Carbohydrates [i](#)

There are no carbohydrates in this entry.

### 5.6 Ligand geometry [i](#)

There are no ligands in this entry.

### 5.7 Other polymers [i](#)

There are no such residues in this entry.

### 5.8 Polymer linkage issues [i](#)

There are no chain breaks in this entry.

PRELIMINARY VALIDATION REPORT

## 6 Fit of model and data [i](#)

### 6.1 Protein, DNA and RNA chains [i](#)

In the following table, the column labelled '#RSRZ> 2' contains the number (and percentage) of RSRZ outliers, followed by percent RSRZ outliers for the chain as percentile scores relative to all X-ray entries and entries of similar resolution. The OWAB column contains the minimum, median, 95<sup>th</sup> percentile and maximum values of the occupancy-weighted average B-factor per residue. The column labelled 'Q< 0.9' lists the number of (and percentage) of residues with an average occupancy less than 0.9.

| Mol | Chain | Analysed     | <RSRZ> | #RSRZ>2   | OWAB(Å <sup>2</sup> ) | Q<0.9 |
|-----|-------|--------------|--------|-----------|-----------------------|-------|
| 1   | A     | 74/74 (100%) | -0.24  | 0 100 100 | 27, 37, 51, 57        | 0     |

There are no RSRZ outliers to report.

### 6.2 Non-standard residues in protein, DNA, RNA chains [i](#)

There are no non-standard protein/DNA/RNA residues in this entry.

### 6.3 Carbohydrates [i](#)

There are no carbohydrates in this entry.

### 6.4 Ligands [i](#)

There are no ligands in this entry.

### 6.5 Other polymers [i](#)

There are no such residues in this entry.
